# Supplementary material
Source: publisher figshare collection journal article supplement (https://acs.figshare.com/ndownloader/files/12544214)
Supplement: Supplementary file 1 [file 12544214]

# Designs of Zwitterionic Interfaces and Membranes

Antoine Venault, Yung Chang\*

Department of Chemical Engineering and R&D Center for Membrane Technology, Chung Yuan Christian University, Chungli District, Taoyuan 320, Taiwan, R.O.C.

## ASSOCIATED CONTENT

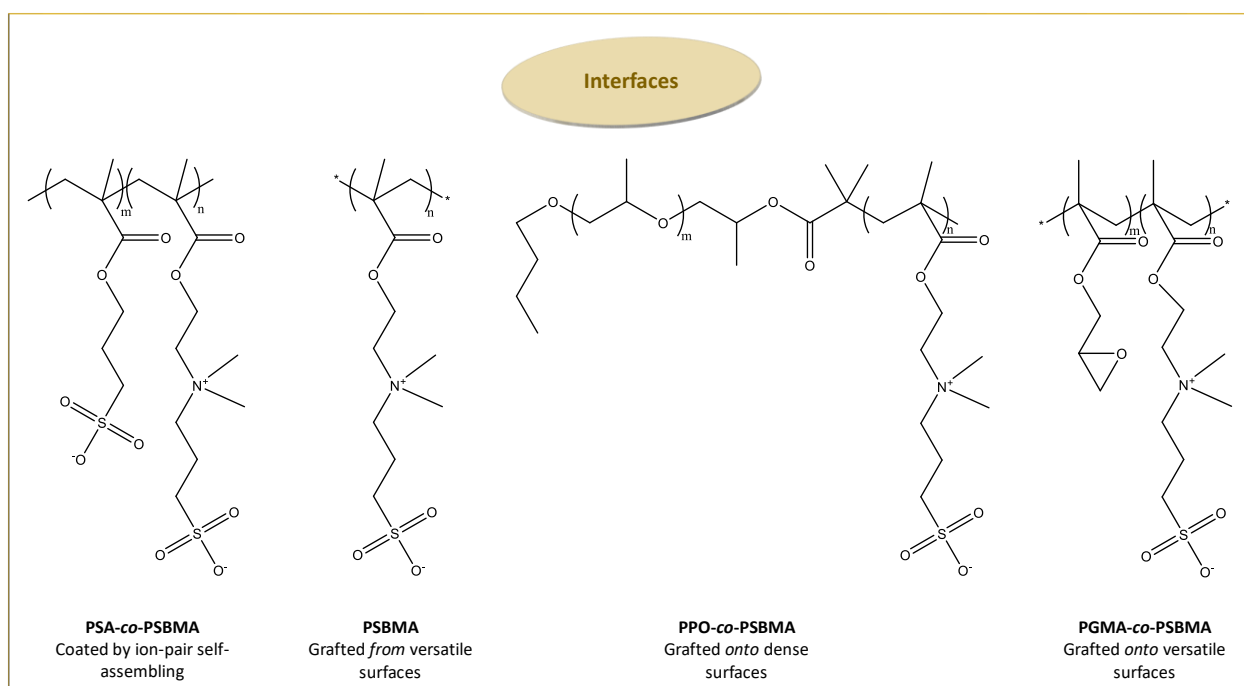

Figure S1. Molecular structure of the major sulfobetaine-based copolymers synthesized in Professor Chang's group used in the modification of interfaces, associated to Figure 1.

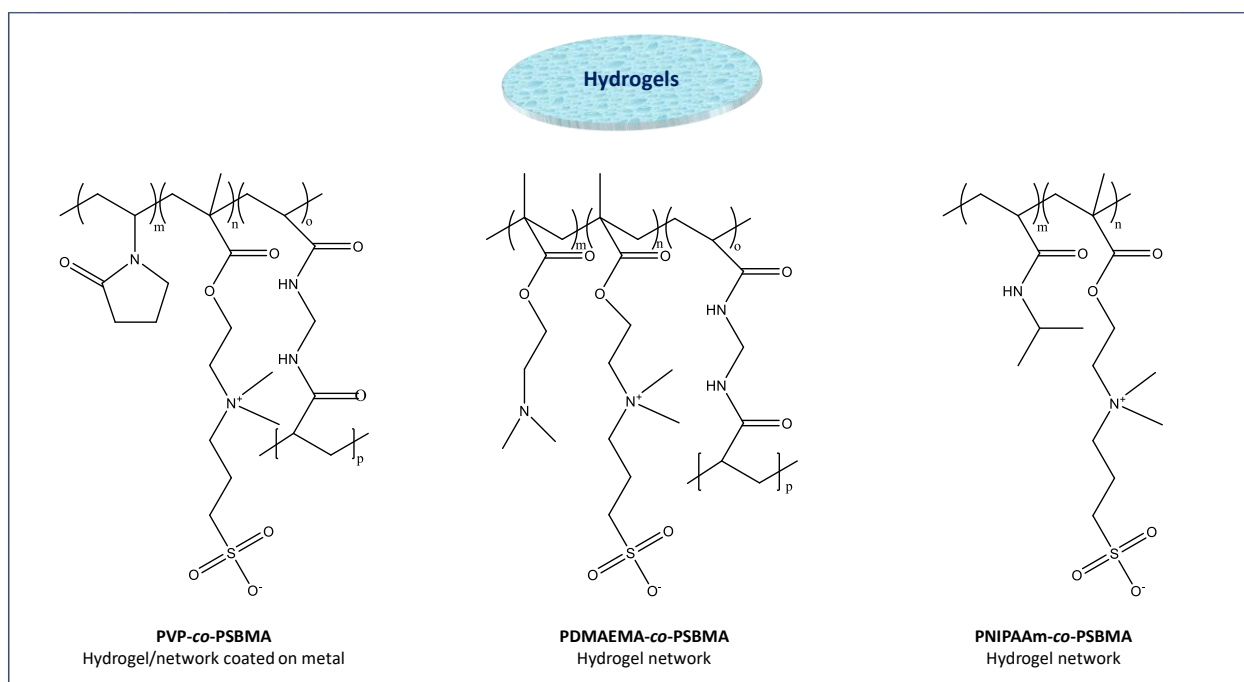

Figure S2. Molecular structure of the major sulfobetaine-based hydrogels prepared in Professor Chang's group, associated to Figure 1.

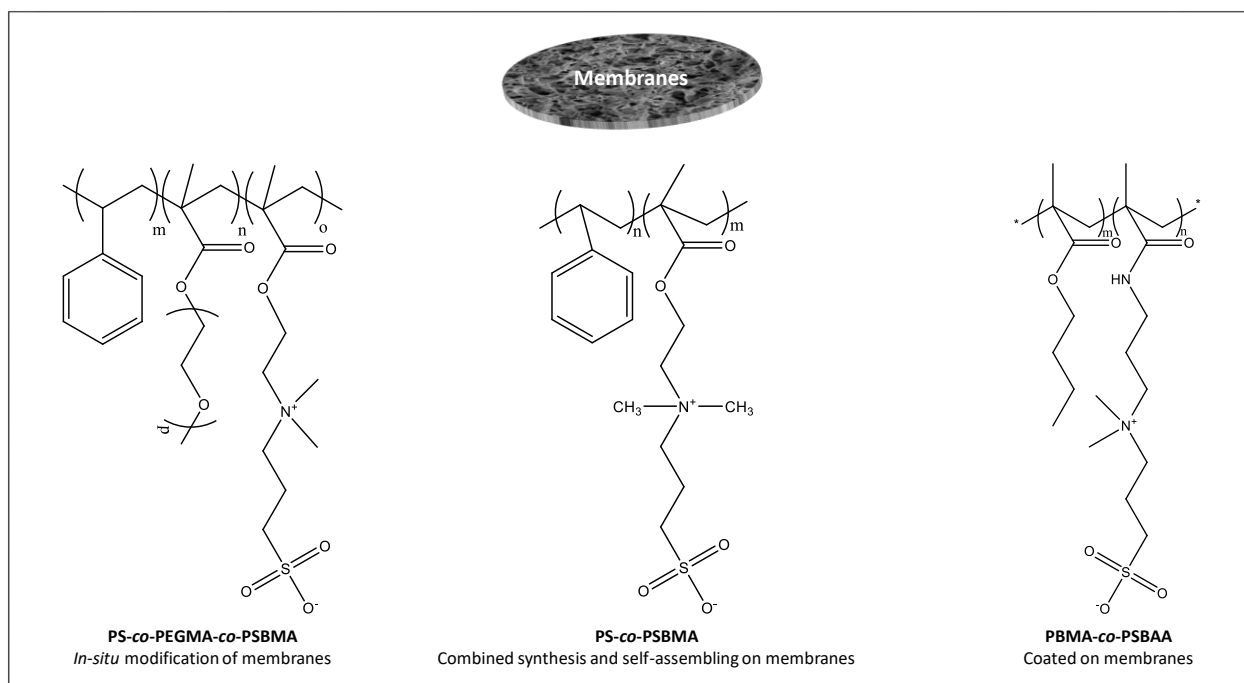

Figure S3. Molecular structure of the major sulfobetaine-based copolymers synthesized in Professor Chang's group used in the modification of membranes, associated to Figure 1.
